# Supplementary material for: Factors Associated with the Work Engagement of Employees Working from Home during the COVID-19 Pandemic in Japan
Source: MDPI journal article supplement (doi:10.3390/ijerph181910495), 2021-10-06
Supplement: s1 [file s1]

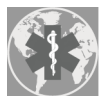

Supplementary Table S1. Prevalence ratio and 95% confidence interval values for high work engagement by whether or not employees were working from home using the Poisson regression model (univariable and multivariable analysis)

|                          |               | univariable           |           |                       |           | multivariable         |           |                       |           |
|--------------------------|---------------|-----------------------|-----------|-----------------------|-----------|-----------------------|-----------|-----------------------|-----------|
|                          |               | Working from home (+) |           | Working from home (-) |           | Working from home (+) |           | Working from home (-) |           |
|                          |               | PR                    | 95%CI     | RR                    | 95%CI     | PR                    | 95%CI     | RR                    | 95%CI     |
| Age (per 10 years)       |               | 1.04                  | 1.00-1.09 | 1.04                  | 1.00-1.09 | 1.04                  | 1.00-1.09 | 1.04                  | 1.00-1.09 |
| Gender (male/female)     |               | 1.04                  | 0.94-1.15 | 1.03                  | 0.98-1.09 | 1.07                  | 0.95-1.20 | 1.06                  | 1.02-1.13 |
| Marital status           | Married       | Reference             |           | Reference             |           | Reference             |           | Reference             |           |
|                          | Never married | 0.80                  | 0.72-0.9  | 0.77                  | 0.72-0.82 | 0.85                  | 0.75-0.97 | 0.85                  | 0.79-0.91 |
|                          | Widowed       | 1.39                  | 0.95-2.02 | 1.28                  | 1.08-1.53 | 1.14                  | 0.77-1.68 | 1.19                  | 1.00-1.43 |
|                          | Separated     | 1.00                  | 0.81-1.24 | 0.97                  | 0.87-1.07 | 0.97                  | 0.84-1.17 | 1.03                  | 0.93-1.14 |
| Shoulder pain (Yes/No)   |               | 0.98                  | 0.89-1.08 | 1.18                  | 1.12-1.25 | 1.06                  | 0.95-1.13 | 1.04                  | 0.97-1.11 |
| Back pain (Yes/No)       |               | 1.16                  | 1.05-1.28 | 1.17                  | 1.10-1.24 | 1.06                  | 0.94-1.17 | 1.03                  | 0.96-1.11 |
| Mental disorder (Yes/No) |               | 1.43                  | 1.29-1.58 | 1.42                  | 1.34-1.50 | 1.33                  | 1.18-1.50 | 1.34                  | 1.25-1.44 |
| Health behavior          |               |                       |           |                       |           |                       |           |                       |           |
| Physical activity        | Increased     | Reference             |           | Reference             |           | Reference             |           | Reference             |           |
|                          | Unchanged     | 0.81                  | 0.71-0.83 | 0.91                  | 0.83-1.00 | 0.86                  | 0.75-1.00 | 0.94                  | 0.85-1.04 |
|                          | Decreased     | 0.81                  | 0.71-0.84 | 0.98                  | 0.88-1.01 | 0.87                  | 0.75-1.00 | 0.99                  | 0.89-1.11 |
| Sleeping hours           | Increased     | Reference             |           | Reference             |           | Reference             |           | Reference             |           |
|                          | Unchanged     | 0.81                  | 0.72-0.91 | 0.96                  | 0.89-1.06 | 0.81                  | 0.72-0.92 | 0.98                  | 0.88-1.09 |
|                          | Decreased     | 0.67                  | 0.55-0.86 | 0.85                  | 0.74-0.97 | 0.72                  | 0.59-0.88 | 0.90                  | 0.99-1.03 |
| Not eating breakfast     | Increased     | Reference             |           | Reference             |           | Reference             |           | Reference             |           |
|                          | Unchanged     | 0.87                  | 0.73-0.91 | 0.94                  | 0.82-1.09 | 0.67                  | 0.50-0.90 | 0.87                  | 0.75-1.01 |
|                          | Decreased     | 1.03                  | 0.83-1.28 | 1.01                  | 0.81-1.20 | 0.90                  | 0.63-1.26 | 0.91                  | 0.76-1.09 |
| Drinking alcohol         | Increased     | Reference             |           | Reference             |           | Reference             |           | Reference             |           |
|                          | Unchanged     | 0.98                  | 0.80-1.19 | 0.98                  | 0.89-1.08 | 1.06                  | 0.92-1.24 | 0.96                  | 0.86-1.06 |
|                          | Decreased     | 1.09                  | 0.86-1.39 | 0.98                  | 0.88-1.10 | 1.07                  | 0.91-1.26 | 0.97                  | 0.87-1.01 |
| Smoking                  | Increased     | Reference             |           | Reference             |           | Reference             |           | Reference             |           |
|                          | Unchanged     | 0.98                  | 0.82-1.18 | 1.01                  | 0.87-1.17 | 1.02                  | 0.82-1.26 | 0.97                  | 0.83-1.14 |
|                          | Decreased     | 0.89                  | 0.72-1.11 | 1.30                  | 0.95-1.34 | 1.02                  | 0.79-1.32 | 1.04                  | 0.87-1.25 |
| Interacting              |               |                       |           |                       |           |                       |           |                       |           |
| With supervisors         | Worse         | Reference             |           | Reference             |           | Reference             |           | Reference             |           |
|                          | Unchanged     | 1.49                  | 1.23-1.81 | 1.50                  | 1.33-1.69 | 1.24                  | 0.98-1.57 | 1.37                  | 1.18-1.59 |
|                          | Better        | 2.12                  | 1.65-2.70 | 2.16                  | 1.82-2.52 | 1.61                  | 1.17-2.22 | 1.76                  | 1.42-2.18 |
| With co-workers          | Worse         | Reference             |           | Reference             |           | Reference             |           | Reference             |           |
|                          | Unchanged     | 1.49                  | 1.21-1.89 | 1.33                  | 1.17-1.50 | 1.20                  | 0.93-1.59 | 1.00                  | 0.85-1.17 |
|                          | Better        | 1.40                  | 1.58-2.68 | 1.86                  | 1.59-2.20 | 1.31                  | 0.93-1.83 | 1.25                  | 1.00-1.55 |
| Working hours            | <40h/week     | Reference             |           | Reference             |           | Reference             |           | Reference             |           |
|                          | ≥ 40h/week    | 0.75                  | 0.67-0.87 | 0.79                  | 0.95-0.84 | 0.84                  | 0.74-0.95 | 0.83                  | 0.77-0.88 |
| Socioeconomic status     |               |                       |           |                       |           |                       |           |                       |           |
| Education                |               | 1.19                  | 1.08-1.31 | 1.06                  | 1.0-1.13  | 0.97                  | 0.84-1.13 | 1.07                  | 1.01-1.14 |
| (≤ 12y/>12y)             |               |                       |           |                       |           |                       |           |                       |           |
| Household income         | -2.99         | Reference             |           | Reference             |           | Reference             |           | Reference             |           |
| (million JPY/year)       | 3.00-7.99     | 0.85                  | 0.71-1.02 | 1.01                  | 0.93-1.09 | 0.94                  | 0.77-1.15 | 1.01                  | 0.93-1.10 |
|                          | 8.00-         | 0.99                  | 0.82-1.19 | 1.11                  | 1.01-1.21 | 1.05                  | 0.85-1.31 | 1.08                  | 0.97-1.19 |
|                          | Unknown       | 0.89                  | 0.71-1.11 | 0.98                  | 0.89-1.08 | 0.94                  | 0.74-1.19 | 0.95                  | 0.86-1.05 |
| Employee status          | Permanent     | Reference             |           | Reference             |           | Reference             |           | Reference             |           |
|                          | Precarious    | 1.06                  | 0.93-1.22 | 1.02                  | 0.96-1.08 | 0.98                  | 0.84-1.15 | 0.94                  | 0.87-1.02 |
|                          | Other         | 1.47                  | 1.26-1.71 | 1.39                  | 1.29-1.51 | 1.27                  | 1.07-1.52 | 1.25                  | 1.15-1.37 |

CI, confidence interval; h, hour; JPY, Japanese Yen; PR, prevalence ratio; y, year.

Note: The results are adjusted for age, gender, marital status, family number per household, shoulder/back pain, mental disorder, health behaviors (physical activity, sleeping hours, not eating breakfast, drinking alcohol, and smoking), interactions (with supervisors and co-workers), working hours, type of job, location, and socioeconomic status (education, household income, and employee status).
